# Supplementary material for: Adverse childhood experiences and adolescent cannabis use trajectories: findings from a longitudinal UK birth cohort
Source: PubMed Central journal article supplement (PMC10751739; doi:10.1016/s2468-2667(23)00095-6), 2023-05-25
Supplement: mmc1.pdf [file mmc1.pdf]

# THE LANCET

## Public Health

### Supplementary appendix

This appendix formed part of the original submission and has been peer reviewed. We post it as supplied by the authors.

Supplement to: Hines LA, Jones HJ, Hickman M, et al. Adverse childhood experiences and adolescent cannabis use trajectories: findings from a longitudinal UK birth cohort. *Lancet Public Health* 2023; **8**: e442–52.

# Exploring the Effect of Adverse Childhood Experiences on Trajectories of Cannabis Use During Adolescence: Findings from a Longitudinal UK

## Birth Cohort

### Appendices and Supplementary Tables

#### Contents

| <b>Page</b> | <b>Item</b>                                                                                                        |
|-------------|--------------------------------------------------------------------------------------------------------------------|
| 1           | Appendix 1: Summary table of literature                                                                            |
| 5           | Appendix 2: Additional methods details                                                                             |
| 16          | Supplementary table 1: Items in the ALSPAC test battery and their cannabis frequency level categorisation          |
| 17          | Supplementary Table 2: Matrix of Pearson correlations between exposures in imputed data (N=5212)                   |
| 17          | Supplementary Table 3: Number of adversities experienced by those reporting four or more adversities               |
| 18          | Supplementary Table 4: Distribution of individual ACEs by ACE count category (%)                                   |
| 19          | Supplementary Table 5: Sample characteristics in non-imputed data for the excluded and complete-case participants  |
| 21          | Supplementary Table 6: Patterns of missing data and distributions in complete case and imputed data                |
| 22          | Supplementary Table 7: Prevalence of cannabis use amongst those attending all 9 waves of data collection age 13-24 |
| 23          | Supplementary table 8: Comparing the model fit of classes derived with different levels of available waves of data |
| 24          | Appendix 3: Regression models with separate covariate adjustment                                                   |

## APPENDIX 1: SUMMARY TABLE OF LITERATURE

The following papers were identified through systematic search. We searched abstracts of journal articles on Medline, Psycinfo and Embase from inception for August 9th 2022, with no restriction on language. Epidemiological studies were included if they 1) used one or multiple of the 10 classic ACEs as the exposure 2) included adolescent cannabis use as an outcome 3) used a general population human sample. The search identified 15 papers, of which 2 were excluded.

Search terms were (“cannabis” or “marijuana”) and adolescen\* and (“ACEs” or “adverse childhood experiences”). Epidemiological studies were included if they 1) used one or multiple of the 10 classic ACEs as the exposure 2) included adolescent cannabis use as an outcome 3) used a general population human sample.

The search identified 15 papers, of which 2 were excluded due to not meeting inclusion criteria.

| Paper details |      | Methods                             |          |                     |                                                   |                         |                        | ACEs measures included in analysis |                                    |                                    |                                    |                                    |                                    |                                    |                                    |                                    |                                    |                        |                       | Covariate adjustment |                               |
|---------------|------|-------------------------------------|----------|---------------------|---------------------------------------------------|-------------------------|------------------------|------------------------------------|------------------------------------|------------------------------------|------------------------------------|------------------------------------|------------------------------------|------------------------------------|------------------------------------|------------------------------------|------------------------------------|------------------------|-----------------------|----------------------|-------------------------------|
| Reference     | Year | Sample                              | Sample N | Longitudinal study? | Measure of frequency or severity of cannabis use? | Timing of cannabis use? | Prospective ACEs data? | Sexual abuse                       | Physical abuse                     | Emotional abuse                    | Emotional neglect                  | Parent substance abuse             | Parent mental health or suicide    | Violence between parents           | Parent separation                  | Bullying                           | Parent criminal conviction         | Individual ACE effects | Dose-response effects | Genetic              | Lifetime parent substance use |
| (1)           | 2022 | USA high school students            | 20125    | No                  | No                                                | No                      | No                     | Yes                                | Yes                                | Yes                                | Yes                                | Yes                                | No                                 | Yes                                | Yes                                | No                                 | Yes                                | No                     | Yes                   | No                   | No                            |
| (2)           | 2022 | USA school students                 | 4980     | No                  | No                                                | Yes                     | No                     | Yes                                | Yes                                | Yes                                | No                                 | Yes                                | Yes                                | Yes                                | No                                 | No                                 | No                                 | No                     | Yes                   | No                   | No                            |
| (3)           | 2022 | USA middle and high school students | 555      | Yes                 | No                                                | No                      | No                     | Yes                                | Yes                                | Yes                                | No                                 | Yes                                | Yes                                | Yes                                | No                                 | No                                 | No                                 | Yes                    | No                    | No                   | No                            |
| (4)           | 2022 | 24-32 year olds (Add Health sample) | 8712     | Yes                 | Yes                                               | Yes                     | No                     | ACE items used not stated in paper | ACE items used not stated in paper | ACE items used not stated in paper | ACE items used not stated in paper | ACE items used not stated in paper | ACE items used not stated in paper | ACE items used not stated in paper | ACE items used not stated in paper | ACE items used not stated in paper | ACE items used not stated in paper | No                     | No                    | No                   | No                            |

|      |      |                                                   |       |     |     |     |     |     |     |     |     |     |     |     |     |     |     |     |     |    |    |
|------|------|---------------------------------------------------|-------|-----|-----|-----|-----|-----|-----|-----|-----|-----|-----|-----|-----|-----|-----|-----|-----|----|----|
| (5)  | 2021 | 12-18 year olds with criminal justice involvement | 271   | No  | No  | No  | No  | Yes | Yes | Yes | Yes | Yes | Yes | Yes | Yes | Yes | Yes | No  | Yes | No | No |
| (6)  | 2021 | Hispanic adolescents (USA)                        | 1399  | Yes | Yes | Yes | No  | Yes | Yes | Yes | No  | Yes | Yes | Yes | Yes | No  | Yes | No  | Yes | No | No |
| (7)  | 2020 | Participants age 12-19 (Add Health)               | 9421  | Yes | Yes | No  | No  | Yes | Yes | Yes | Yes | Yes | Yes | No  | Yes | Yes | Yes | No  | Yes | No | No |
| (8)  | 2019 | USA adolescents                                   | 465   | Yes | Yes | Yes | Yes | Yes | Yes | Yes | No  | Yes | Yes | Yes | No  | Yes | Yes | No  | Yes | No | No |
| (9)  | 2019 | Participants age 13-19 years, USA                 | 1053  | No  | No  | No  | No  | No  | No  | No  | No  | Yes | Yes | Yes | Yes | No  | Yes | No  | Yes | No | No |
| (10) | 2018 | 5th-11th grade students, USA                      | 79339 | No  | No  | Yes | No  | Yes | Yes | Yes | No  | Yes | No  | Yes | No  | No  | No  | No  | No  | No | No |
| (11) | 2018 | Pupils in 8th, 9th and 11th grade, USA            | 1E+05 | No  | Yes | No  | No  | Yes | Yes | Yes | No  | Yes | No  | Yes | No  | No  | Yes | Yes | Yes | No | No |
| (12) | 2018 | Participants age 12-20                            | 9422  | Yes | Yes | Yes | No  | Yes | Yes | No  | Yes | No  | No  | No  | No  | No  | No  | Yes | No  | No | No |

|      |      |                                      |       |     |     |    |    |     |     |     |    |    |    |    |    |    |    |    |     |    |    |
|------|------|--------------------------------------|-------|-----|-----|----|----|-----|-----|-----|----|----|----|----|----|----|----|----|-----|----|----|
| (13) | 2017 | Participants aged 24-32 (Add Health) | 11279 | Yes | Yes | No | No | Yes | Yes | Yes | No | No | No | No | No | No | No | No | Yes | No | No |
|------|------|--------------------------------------|-------|-----|-----|----|----|-----|-----|-----|----|----|----|----|----|----|----|----|-----|----|----|

## APPENDIX 2: ADDITIONAL METHODS DETAILS

### Study population

Pregnant women in the former Avon Health Authority in south-west England who had an estimated date of delivery between 1 April 1991 and 31 December 1992 were invited to take part via media campaigns and outreach through antenatal and maternity services. (14) This resulted in a cohort of 14 541 pregnancies and 13,988 children alive at 1 year of age. When the oldest children were approximately 7 years of age, an attempt was made to bolster the initial sample with eligible cases who had failed to join the study originally. The total sample size for analyses using any data collected after the age of seven is therefore 15,454 pregnancies, resulting in 15,589 fetuses. Of these 14,901 were alive at 1 year of age.(15) From an eligible sample of 20, 248 pregnancies, 15, 247 pregnancies were enrolled over multiple stages of recruitment, resulting in 75% of eligible pregnancies being recruited. (14) In comparison to a national sample, ALSPAC enrolled participants at age 16 were found to have higher educational attainment, were more likely to be white and less likely to be eligible for free school meals. (14)

There were 68 data collection time points between birth and age 18, including 34 child-completed questionnaires, 9 ‘focus’ clinical assessments and 25 questionnaires about the child completed by the mother or other main caregiver. Response rates have previously been published in full;(14) during adolescence, 48% of the eligible sample completed all 12 measures, and 75% completed at least one measure.

The ALSPAC study website contains details of all the data available through a fully searchable data dictionary (<http://www.bristol.ac.uk/alspac/researchers/our-data/>). Study data were collected and managed using REDCap electronic data capture tools hosted at University of Bristol (16,17).

### Measures

#### *Exposure*

*Adverse Childhood Experiences* Participants in ALSPAC were asked to report on exposure to ACEs at multiple time points. The process of identifying the relevant items from this longitudinal study, in which ACEs data were collected from birth-23 years, has been previously outlined (18), but briefly:

Text scanning and visual searching of the ALSPAC data dictionary, which includes mother, child (with the child as the study participant) and mothers partner reports (59608 variables), was conducted in 2017 to identify the ACEs variables. Identified items were excluded if they did not conform to ACE definitions or were unsuitable for dichotomisation. Variables were recoded to a binary yes/no based on pre-set criteria.

The majority (89%) of measures included were assessed contemporaneously through childhood/adolescence, but retrospective self-report measures collected when participants were in their 20s (several forms of abuse and neglect, parents being violent towards each other) were included to complement the prospective data. For instance, the sexual abuse rates prospectively reported by parents were much lower than those retrospectively self-reported by the participants.

ACEs were defined as (18):

Sexual abuse - Ever sexually abused, forced to perform sexual acts or touch someone in a sexual way

Physical abuse -Adult in family was ever physically cruel towards or hurt the child

Emotional abuse -Parent was ever emotionally cruel towards the child or often said hurtful/insulting things to the child

Emotional neglect -Child always felt excluded, misunderstood or never important to family, parents never asked or never listened when child talked about their free time

Parent substance use/abuse -Parent was a daily cannabis or any hard drug user, or, had an alcohol problem

Parent mental health problems or suicide -Parent was ever diagnosed with schizophrenia or hospitalised for a psychiatric problem, or, during the first 18 years of the child's life, parent had an eating disorder (bulimia or anorexia), used medication for depression or anxiety, attempted suicide or scored above previously established cut-offs for depression (Edinburgh Postnatal Depression Scale (EPDS) >12 <sup>13</sup>)

Violence between parents -parents were ever affected by physically cruel behaviour by partner, or, ever violent towards each other, including hitting, choking, strangling, beating, shoving.

Parental separation -Parents separated or divorced

Bullying -Child was a victim of bullying on a weekly basis

Parent convicted of a criminal offence -Parent was convicted of a crime

Questions were asked at multiple time points. For physical abuse, 49 variables were identified of which 32 were prospective and 9 child reported. For sexual abuse, 12 variables were identified of which 7 were prospective and 5 child reported. For emotional abuse, 46 variables were identified of which 33 were prospective and 5 child reported. For emotional neglect, 23 variables were identified of which 20 were prospective and 20 child reported. For bullying, 19 variables were identified of which all were prospective and child reported. For household substance abuse, 70 variables were identified of which 70 were prospective and 1 child reported. For violence between parents, 48 variables were identified of which 44 were prospective and none child reported. For parent mental health problems or suicide, 82 variables were identified of which 78 were prospective and 2 child reported. For parent convicted of a criminal offence, 25 variables were identified of which 21 were prospective and none child reported. For parent separation, 48 variables were identified of which 39 were prospective and 3 child reported.

Because the ACE measures were derived from multiple questionnaires and clinics over a long time period (birth–23 years), no participants had data on all of the individual questionnaire items, necessitating the use of multivariate multiple imputation. Ideally, we would impute missing values of each questionnaire item, but the lack of complete cases in combination with the high number of variables (>500 separate questions relating to ACEs up to age 23) led to convergence errors. Therefore, we adopted a pragmatic approach to imputation, adapted from the scale-level imputation method proposed by Enders(19). We derived a dichotomous construct indicating presence or absence of each ACE. If a participant responded to 50% or more of the questions related to a given ACE, we used these data to create the dichotomous indicator. If the participant responded to less than 50% of the questions, we set the dichotomous indicator to missing. This avoided inducing biases which may occur if sample eligibility is easier for some participants than others (e.g. only needing to respond yes once to be a case, but needing to respond no at all time points to be a non-case).

Appendix 2 Table 1: Items included for ACE variables for ALSPAC data (reproduced with permission from 10.12688/wellcomeopenres.14716.1)

| <b>Adverse childhood experience (ACE)</b> | <b>Phrasing</b>                                        | <b>Criterion dichotomisation</b> | <b>Retrospective</b> |
|-------------------------------------------|--------------------------------------------------------|----------------------------------|----------------------|
| <b>Sexual abuse</b>                       | Sexually abused                                        | yes                              | no                   |
|                                           | When growing up someone molested respondent (sexually) | yes                              | yes (asked at 23yrs) |



|                          |                                                                                                                                                                                                |                |                      |
|--------------------------|------------------------------------------------------------------------------------------------------------------------------------------------------------------------------------------------|----------------|----------------------|
|                          | Touched in a sexual way by adult or older child, or was forced to touch adult or older child in a sexual way, before age of 11                                                                 | yes            | yes (asked at 22yrs) |
|                          | Touched in a sexual way by adult or older child, or was forced to touch adult or older child in a sexual way, between ages of 11 and 17                                                        | yes            | yes (asked at 22yrs) |
|                          | Adult or older child forced, or attempted to force, respondent into any sexual activity by threatening or holding respondent down or hurting respondent in some way, before age of 11          | yes            | yes (asked at 22yrs) |
|                          | Adult or older child forced, or attempted to force, respondent into any sexual activity by threatening or holding respondent down or hurting respondent in some way, between ages of 11 and 17 | yes            | yes (asked at 22yrs) |
| <b>Physical abuse</b>    | Partner/respondent was physically cruel to child                                                                                                                                               | yes            | no                   |
|                          | Adult in family pushed, grabbed, shoved/smacked to discipline respondent, before age of 11                                                                                                     | often          | yes (asked at 22yrs) |
|                          | Adult in family pushed, grabbed, shoved/smacked to discipline respondent, between ages 11 and 17                                                                                               | often          | yes (asked at 22yrs) |
|                          | When growing up people in respondent's family hit them so hard that it left them with bruises or marks                                                                                         | yes            | yes (asked at 23yrs) |
|                          | Adult in family kicked, punched, hit respondent (so hard it left bruises or marks), before age of 11                                                                                           | yes            | yes (asked at 22yrs) |
|                          | Adult in family kicked, punched, hit respondent (so hard it left bruises or marks), between ages 11 and 17                                                                                     | yes            | yes (asked at 22yrs) |
| <b>Emotional neglect</b> | Carer knows who friends are                                                                                                                                                                    | never          | no                   |
|                          | Carer asks/starts conversation about free time/ what happened at school                                                                                                                        | never          | no                   |
|                          | Carer takes time to listen when teenager talks about what happened in free time                                                                                                                | never          | no                   |
|                          | Discuss problems with anyone in their family                                                                                                                                                   | very difficult | no                   |

|                                                        |                                                                                                        |                             |                                            |
|--------------------------------------------------------|--------------------------------------------------------------------------------------------------------|-----------------------------|--------------------------------------------|
|                                                        | Parent/carer talked about child's experiences at school/ friends/ things that are troubling            | never                       | no                                         |
|                                                        | Child feels left out of things                                                                         | always                      | no                                         |
|                                                        | Understood by parents                                                                                  | not                         | no                                         |
|                                                        | When growing up there was someone to take respondent to the doctor if needed                           | never                       | yes (asked at 23yrs)                       |
|                                                        | Someone in family made child feel important or special, before 11                                      | never                       | yes (asked at 22yrs)                       |
|                                                        | Someone in family made child feel important or special, between ages 11 and 17                         | never                       | yes (asked at 22yrs)                       |
|                                                        | Carer knows what child does with other children                                                        | nothing                     | no                                         |
| <b>Emotional abuse</b>                                 | Partner/respondent was emotionally cruel to child                                                      | yes                         | no                                         |
|                                                        | Adult in family shouted/ said hurtful or insulting things to respondent, before age of 11              | Very often                  | yes (asked at 22yrs)                       |
|                                                        | Adult in family shouted/ said hurtful or insulting things to respondent, between the ages of 11 and 17 | Very often                  | yes (asked at 22yrs)                       |
| <b>Parental separation</b>                             | Parent reports divorce/separation                                                                      | yes                         | no                                         |
|                                                        | Your parents have divorced/separated                                                                   | yes                         | no                                         |
|                                                        | Parent still has the same partner/husband                                                              | no                          | no                                         |
| <b>Mental health and suicide (attempts) by parents</b> | Parent has hurt themselves on purpose                                                                  | yes                         | no                                         |
|                                                        | Parent has attempted suicide                                                                           | yes                         | yes, the reported age can be retrospective |
|                                                        | Taken medication for anxiety or depression                                                             | yes                         | no                                         |
|                                                        | Edinburgh Postnatal Depression Scale (EPDS)                                                            | >12                         | no                                         |
|                                                        | Schizophrenia                                                                                          | yes, either current or ever | Both                                       |
|                                                        | Bulimia, anorexia nervosa                                                                              | yes, recently               | Both                                       |
|                                                        | Ever admitted to hospital for psychiatric or mental health problems                                    | yes                         | yes                                        |
| <b>Parents violent towards each other</b>              | Physically cruel                                                                                       | yes, affected them          | yes, the reported age can be retrospective |

|                                     |                                                                                                            |                             |                                            |
|-------------------------------------|------------------------------------------------------------------------------------------------------------|-----------------------------|--------------------------------------------|
|                                     | Aware of and affected by one 'parent' slapping, kicking, hitting or otherwise physically hurting the other | yes, ever                   | yes (asked at 21yrs)                       |
|                                     | Kicked, bitten or hit each other                                                                           | yes                         | no                                         |
|                                     | Physically twisted arm                                                                                     | yes                         | no                                         |
|                                     | Throw(n) bodily                                                                                            | yes                         | no                                         |
|                                     | Beaten each other up                                                                                       | yes                         | no                                         |
|                                     | Choke or strangle each other                                                                               | yes                         | no                                         |
|                                     | threatened each other with knife                                                                           | yes                         | no                                         |
|                                     | Used knife or other weapon on each other                                                                   | yes                         | no                                         |
| <b>Substance abuse in household</b> | Smoked cannabis                                                                                            | every day                   | no                                         |
|                                     | Hard drug use (including crack, heroin, amphetamine, opiate, cocaine, methadone, meth)                     | yes                         | no                                         |
|                                     | Hard drug addiction                                                                                        | yes, recently               | no                                         |
|                                     | Alcoholism/ Drink problem                                                                                  | yes, ever / yes, saw doctor | no                                         |
|                                     | Alcohol Use Disorders Identification Test (AUDIT) score                                                    | >8                          | no                                         |
| <b>Parent convicted</b>             | Court conviction                                                                                           | yes                         | no                                         |
|                                     | Convicted of an offence                                                                                    | yes                         | yes, the reported age can be retrospective |
| <b>Bullying</b>                     | Overt bullying victim items including: personal belongings stolen, threatened/blackmailed, hit/beaten up   | weekly                      | no                                         |
|                                     | Relational bullying victim items including: do something didn't want to, told lies about child             | weekly                      | no                                         |
|                                     | Friends tried to get teenager to do things didn't want to / told lies about teenager                       | weekly                      | no                                         |
|                                     | Young person has been directly/relationally bullied                                                        | weekly                      | no                                         |
|                                     | Child has been bullied                                                                                     | all the time                | no                                         |
|                                     | Upset by name calling/exclusion from groups or bullying                                                    | Most days                   | no                                         |

|  |                                         |        |    |
|--|-----------------------------------------|--------|----|
|  | Someone threatened/blackmailed teenager | weekly | no |
|--|-----------------------------------------|--------|----|

### *Covariates*

*Maternal and/or Partner drug use during pregnancy (preceding ACE exposure).* At 18 weeks gestation, mothers were asked if they had smoked cannabis or used any of amphetamine, barbiturates, crack, cocaine, heroin, methadone, ecstasy or any other drugs during pregnancy, and partners were asked if they had used any of the previously stated drugs in the past 3 month. Report of use of any of these drugs was classified respectively as maternal or partner illicit drug use during pregnancy.

*Maternal/Partner mental health prior to/during pregnancy (preceding ACE exposure).* At 12 weeks gestation, mothers and their partners reported on whether they'd ever experienced bulimia, drug addiction, alcoholism, schizophrenia, anorexia nervosa, severe depression, or other psychiatric problem. Mothers and partners who responded 'yes' to any of these items were classified as having experienced a mental health problem prior to or during pregnancy.

*Childhood Socioeconomic Position (SEP)* Childhood SEP was assessed through the highest occupation of the participant's mother or father, dichotomised as low (partly skilled or unskilled occupations) or higher (professional/managerial/technical/skilled manual or non-manual occupation). Data were collected through parental report when participants were 8 months, 21 months, 33 months, 4 years and 8 years of age.

*Financial difficulties.* At 32 weeks gestation (preceding participant ACE exposure) mothers rating difficulty above 0 for any of affording food, clothes, heating, rent/mortgage and other things considered essential for the child s were categorised as experiencing financial difficulty.

*Cannabis initiation polygenic score: Genetic data.* ALSPAC genetic data were acquired using the Illumina HumanHap550 quad genome-wide single nucleotide polymorphism (SNP) genotyping platform from 9912 participants. Following quality control assessment and imputation, genetic data was available for 7977 ALSPAC individuals. Polygenic scores were created using the PLINK (v1.9) (28,29) 'score' command. Polygenic scores were based on SNPs meeting a p-value threshold  $\leq 0.5$  in the cannabis initiation GWAS.

ALSPAC participant genetic data were acquired using the Illumina HumanHap550 quad genome-wide single nucleotide polymorphism (SNP) genotyping platform from 9912 participants. ALSPAC mother genetic data were acquired using the Illumina Human660W-quad genome-wide SNP genotyping platform from 10,015 participant mothers.

Individuals were excluded from further analysis on the basis of gender mismatches, minimal or excessive heterozygosity, disproportionate levels of individual missingness (>1%), evidence of cryptic relatedness (>10% of alleles identical by descent) and being of non-European ancestry (assessed by multidimensional scaling analysis including HapMap 2 individuals). SNPs with a minor allele frequency (MAF) of < 1%, Impute2 information quality metric of < 0.8, a call rate of < 95% or evidence for violations of Hardy-Weinberg equilibrium ( $p$  value <  $5 \times 10^{-7}$ ) were removed. Imputation of the ALSPAC genetic data was performed following haplotype estimation using ShapeIT (v2.r644) which utilises relatedness during phasing. Imputation was performed using Impute V2.2.2 against the 1000 genomes reference panel (Phase 1, Version 3; all polymorphic SNPs excluding singletons), using 2,186 reference haplotypes (including non-Europeans). Following quality control assessment and imputation, restricting to 1 young person per family, and excluding individuals who had withdrawn consent, genetic data were available for 477,482 SNPs for 7,977 ALSPAC participants and 8,251 ALSPAC participant mothers.

*Polygenic Risk Scores (PRS)* PRS for lifetime cannabis use were constructed for each ALSPAC individual using participants' genetic data and results of a lifetime cannabis use genome-wide association study (GWAS) meta-analysis ( International Cannabis Consortium (ICC) and UK Biobank ( $n = 184\,765$ )) (20) as a training set. Note that as ALSPAC formed part of the ICC GWAS sample, GWAS meta-analysis results were re-estimated after removal of the ALSPAC sample to avoid bias created by sample overlap. Prior to construction of scores, SNPs were removed from the analysis if they had a minor allele frequency less than 0.01, an imputation quality less than 0.8 or if there was allelic mismatch between ALSPAC and GWAS samples. Due to the high linkage disequilibrium (LD) within the extended major histocompatibility complex (MHC; chromosome 6: 25-34Mb) only a single SNP was included to represent this region. SNPs were pruned for LD using the PLINK 'clump' command to remove SNPs in LD ( $r^2 > 0.25$ ) with a more significant SNP in the training set. Windows of 500kb were used to assess inter-SNP LD for pruning. PRS were then calculated using the PLINK (v1.9) (21,22) 'score' command. This command creates an average, weighted score for each individual based on the number of SNP effect alleles the individual has, multiplied by the magnitude of the GWAS association value for that SNP. Polygenic scores were constructed using SNPs meeting a p-value threshold  $\leq 0.5$  and weighted using the  $\log(\text{OR})$  for each SNP as reported in the lifetime cannabis use GWAS meta-analysis. (20)

For use as an auxiliary variable in the multiple imputation prior to analysis, lifetime cannabis use PRS were also created for ALSPAC participant mothers based on results of the ICC cannabis initiation GWAS (23) after removal of ALSPAC from the ICC GWAS meta-analysis.

## Analysis

*Missing data imputation.* The rationale behind imputation of the ACE variables has been outlined previously (18). Briefly, individuals who had responded to <50% of ACE items were coded as missing for binary ACE measures (see above). Separate imputation models were performed for males and females. Each imputation model included all exposures, covariates and the outcome trajectory classes. The following variables were included in the present analysis as auxiliary variables for imputation of ACEs and covariates: maternal smoking during pregnancy, maternal homeownership status during pregnancy, maternal marital status during pregnancy, maternal weight prior to birth, age of mother at birth, maternal education, participant birthweight, weeks' gestation at delivery, parity, participant relationship separation at age 18, frequency of anti-depressant use at age 18, mother and partner's depression scores during pregnancy, participant depression score at age 18, participant AUDIT depression score at age 18, and father's AUDIT score (collected in participant's adulthood). Maternal PRS for cannabis was included as an auxiliary variable to facilitate imputation of participant cannabis initiation PRS.

Summary variables for experiencing any ACEs, or four or more ACEs, were derived following multiple imputation from the individual ACE measures. Estimates were obtained by pooling results across 40 imputed datasets using Rubin's rules (24).

## References

1. Boccio CM, Meldrum RC, Jackson DB. Adverse childhood experiences and adolescent nicotine and marijuana vaping: Findings from a statewide sample of Florida youth. *Prev Med.* 2022 Jan 1;154:106866.
2. Clements-Nolle KD, Lensch T, Drake CS, Pearson JL. Adverse childhood experiences and past 30-day cannabis use among middle and high school students: The protective influence of families and schools. *Addict Behav.* 2022 Jul 1;130:107280.
3. Garduno LS. How Influential are Adverse Childhood Experiences (ACEs) on Youths?: Analyzing the Immediate and Lagged Effect of ACEs on Deviant Behaviors. *J Child Adolesc Trauma.* 2022 Sep 1;15(3):683–700.
4. Rajapaksha RMDS, Filbey F, Biswas S, Choudhary P. A Bayesian learning model to predict the risk for cannabis use disorder. *Drug Alcohol Depend.* 2022 Jul 1;236:109476.
5. Folk JB, Ramos LMC, Bath EP, Rosen B, Marshall BDL, Kemp K, et al. The Prospective Impact of Adverse Childhood Experiences on Justice-Involved Youth's Psychiatric Symptoms and Substance Use. *J Consult Clin Psychol.* 2021 Jun;89(6):483–98.

6. Rogers CJ, Forster M, Grigsby TJ, Albers L, Morales C, Unger JB. The impact of childhood trauma on substance use trajectories from adolescence to adulthood: Findings from a longitudinal Hispanic cohort study. *Child Abuse Negl.* 2021 Oct;120:105200.
7. Moss HB, Ge S, Trager E, Saavedra M, Yau M, Ijeaku I, et al. Risk for Substance Use Disorders in young adulthood: Associations with developmental experiences of homelessness, foster care, and adverse childhood experiences. *Compr Psychiatry.* 2020 Jul;100:152175.
8. Fava NM, Trucco EM, Martz ME, Cope LM, Jester JM, Zucker RA, et al. Childhood adversity, externalizing behavior, and substance use in adolescence: Mediating effects of anterior cingulate cortex activation during inhibitory errors. *Dev Psychopathol.* 2019 Oct;31(4):1439–50.
9. Stalgaitis CA, Wagner DE, Djakaria M, Jordan JW. Understanding Adversity and Peer Crowds to Prevent Youth Health Risks. *Am J Health Behav.* 2019 Jul 1;43(4):767–80.
10. Chatterjee D, McMorris B, Gower AL, Forster M, Borowsky IW, Eisenberg ME. Adverse Childhood Experiences and Early Initiation of Marijuana and Alcohol Use: The Potential Moderating Effects of Internal Assets. *Subst Use Misuse.* 2018;53(10):1624–32.
11. Duke NN. Adolescent Adversity and Concurrent Tobacco, Alcohol, and Marijuana Use. *Am J Health Behav.* 2018 Sep 1;42(5):85–99.
12. Oshri A, Kogan SM, Kwon JA, Wickrama K a. S, Vanderbroek L, Palmer AA, et al. Impulsivity as a mechanism linking child abuse and neglect with substance use in adolescence and adulthood. *Dev Psychopathol.* 2018 May;30(2):417–35.
13. LeTendre ML, Reed MB. The Effect of Adverse Childhood Experience on Clinical Diagnosis of a Substance Use Disorder: Results of a Nationally Representative Study. *Subst Use Misuse.* 2017;52(6):689–97.
14. Boyd A, Golding J, Macleod J, Lawlor DA, Fraser A, Henderson J, et al. Cohort Profile: The ‘Children of the 90s’—the index offspring of the Avon Longitudinal Study of Parents and Children. *Int J Epidemiol.* 2013 Feb;42(1):111–27.
15. Northstone K, Lewcock M, Groom A, Boyd A, Macleod J, Timpson N, et al. The Avon Longitudinal Study of Parents and Children (ALSPAC): an update on the enrolled sample of index children in 2019. *Wellcome Open Res [Internet].* 2019 Mar 14 [cited 2019 Nov 6];4. Available from: <https://www.ncbi.nlm.nih.gov/pmc/articles/PMC6464058/>
16. Harris PA, Taylor R, Minor BL, Elliott V, Fernandez M, O’Neal L, et al. The REDCap consortium: Building an international community of software platform partners. *J Biomed Inform.* 2019 Jul 1;95:103208.
17. Harris PA, Taylor R, Thielke R, Payne J, Gonzalez N, Conde JG. Research electronic data capture (REDCap)—A metadata-driven methodology and workflow process for providing translational research informatics support. *J Biomed Inform.* 2009 Apr 1;42(2):377–81.
18. Houtepen LC, Heron J, Suderman MJ, Tilling K, Howe LD. Adverse childhood experiences in the children of the Avon Longitudinal Study of Parents and Children (ALSPAC). *Wellcome Open Res.* 2018 Aug 30;3:106.

19. Enders CK. Applied missing data analysis. New York, NY, US: Guilford Press; 2010. xv, 377 p. (Applied missing data analysis).
20. Pasmán JA, Verweij KJH, Gerring Z, Stringer S, Sanchez-Roige S, Treur JL, et al. GWAS of lifetime cannabis use reveals new risk loci, genetic overlap with psychiatric traits, and a causal influence of schizophrenia. *Nat Neurosci*. 2018 Sep;21(9):1161–70.
21. Chang CC, Chow CC, Tellier LC, Vattikuti S, Purcell SM, Lee JJ. Second-generation PLINK: rising to the challenge of larger and richer datasets. *GigaScience*. 2015;4:7.
22. Purcell S, Neale B, Todd-Brown K, Thomas L, Ferreira MAR, Bender D, et al. PLINK: a tool set for whole-genome association and population-based linkage analyses. *Am J Hum Genet*. 2007 Sep;81(3):559–75.
23. Stringer S, Minică CC, Verweij KJH, Mbarek H, Bernard M, Derringer J, et al. Genome-wide association study of lifetime cannabis use based on a large meta-analytic sample of 32 330 subjects from the International Cannabis Consortium. *Transl Psychiatry*. 2016 Mar 29;6:e769.
24. Rubin DB, editor. Multiple Imputation for Nonresponse in Surveys [Internet]. Hoboken, NJ, USA: John Wiley & Sons, Inc.; 1987 [cited 2021 Aug 23]. (Wiley Series in Probability and Statistics). Available from: <http://doi.wiley.com/10.1002/9780470316696>



**Supplementary table 1: Items in the ALSPAC test battery and their cannabis frequency level categorisation**

| <b>Categorisation of cannabis use in analyses</b> | <b>Item in ALSPAC test battery (age and source)</b>                                  |                                                                                                                                                                                                                                    |                                                                                                                                                                                                                                |                                                                                                                                                                                                                                    |                                                                                                |                                                                                                                                                           |                                                                                                                                                                                                                                                                             |                                                                                                                                                                                                                                                                             |                                                                                                                                                                                                                                                                             |
|---------------------------------------------------|--------------------------------------------------------------------------------------|------------------------------------------------------------------------------------------------------------------------------------------------------------------------------------------------------------------------------------|--------------------------------------------------------------------------------------------------------------------------------------------------------------------------------------------------------------------------------|------------------------------------------------------------------------------------------------------------------------------------------------------------------------------------------------------------------------------------|------------------------------------------------------------------------------------------------|-----------------------------------------------------------------------------------------------------------------------------------------------------------|-----------------------------------------------------------------------------------------------------------------------------------------------------------------------------------------------------------------------------------------------------------------------------|-----------------------------------------------------------------------------------------------------------------------------------------------------------------------------------------------------------------------------------------------------------------------------|-----------------------------------------------------------------------------------------------------------------------------------------------------------------------------------------------------------------------------------------------------------------------------|
|                                                   | <b>13years</b><br><i>Computer in clinic</i>                                          | <b>14years</b><br><i>Postal questionnaire</i>                                                                                                                                                                                      | <b>15years</b><br><i>Computer in clinic</i>                                                                                                                                                                                    | <b>16years</b><br><i>Postal questionnaire</i>                                                                                                                                                                                      | <b>17years</b><br><i>Computer in clinic</i>                                                    | <b>18years</b><br><i>Postal questionnaire</i>                                                                                                             | <b>20 years</b><br><i>Postal questionnaire</i>                                                                                                                                                                                                                              | <b>22 years</b><br><i>Postal questionnaire</i>                                                                                                                                                                                                                              | <b>24 years</b><br><i>Computer in clinic</i>                                                                                                                                                                                                                                |
| Do not use                                        | "Have you ever tried cannabis?" = "No"                                               | "Have you ever tried cannabis?" = "No"                                                                                                                                                                                             | "Have you ever tried cannabis?" = "No"                                                                                                                                                                                         | "Have you ever tried cannabis?" = "No"                                                                                                                                                                                             | Ever tried cannabis? = "No"                                                                    | "Have you ever tried cannabis?" = "No"                                                                                                                    | "Have you ever tried cannabis?" = "No"                                                                                                                                                                                                                                      | "Have you ever tried cannabis?" = "No"                                                                                                                                                                                                                                      | "Have you ever tried cannabis?" = "No"                                                                                                                                                                                                                                      |
| Occasional                                        | If "yes" to stem, "How many times in the last 6 months?" = "1-3 times" or ">4 times" | Or, if "yes" to stem, "I have only ever tried cannabis once or twice" or "I used to sometimes use or take cannabis but I never do now"<br><br>If "yes" to stem, "I sometimes use or take cannabis but less often than once a week" | Or, if "yes" to stem, "I have only ever tried cannabis once or twice" or "I used to sometimes use or take cannabis but I never do now"<br><br>If "yes" to stem, "I sometimes take cannabis but less often than once a week"    | Or, if "yes" to stem, "I have only ever tried cannabis once or twice" or "I used to sometimes use or take cannabis but I never do now"<br><br>If "yes" to stem, "I sometimes use or take cannabis but less often than once a week" | If "yes" to stem, cannabis use in past 12 months = "Monthly or less" or "2-4 times per month"  | If "yes" to stem, "In the last 12 months, how often have you used cannabis?" = "Once or twice" or "Less than monthly" or "Monthly (but less than weekly)" | Or, if "yes" to stem, "In the last 12 months, how often have you used cannabis?" = "Not in the last 12 months"<br>If "yes" to stem, "In the last 12 months, how often have you used cannabis?" = "Once or twice" or "Less than monthly" or "Monthly (but less than weekly)" | Or, if "yes" to stem, "In the last 12 months, how often have you used cannabis?" = "Not in the last 12 months"<br>If "yes" to stem, "In the last 12 months, how often have you used cannabis?" = "Once or twice" or "Less than monthly" or "Monthly (but less than weekly)" | Or, if "yes" to stem, "In the last 12 months, how often have you used cannabis?" = "Not in the last 12 months"<br>If "yes" to stem, "In the last 12 months, how often have you used cannabis?" = "Once or twice" or "Less than monthly" or "Monthly (but less than weekly)" |
| Regular                                           | If "yes" to stem, "How many times in the last 6 months?" = "1 x per week"            | If "yes" to stem, "I usually use or take cannabis between one and six times a week" or "I usually use or take cannabis more than six times a week, but I don't use it every day" or "I usually use or take cannabis every day"     | If "yes" to stem, "I usually use or take cannabis between one and six times a week" or "I usually use or take cannabis more than six times a week, but I don't use it every day" or "I usually use or take cannabis every day" | If "yes" to stem, "I usually use or take cannabis between one and six times a week" or "I usually use or take cannabis more than six times a week, but I don't use it every day" or "I usually use or take cannabis every day"     | If "yes" to stem, cannabis use in past 12 months = "2-3 times per week" or "4+ times per week" | If "yes" to stem, "In the last 12 months, how often have you used cannabis?" = "Weekly" or "Daily or almost daily"                                        | If "yes" to stem, "In the last 12 months, how often have you used cannabis?" = "Weekly" or "Daily or almost daily"                                                                                                                                                          | If "yes" to stem, "In the last 12 months, how often have you used cannabis?" = "Weekly" or "Daily or almost daily"                                                                                                                                                          | If "yes" to stem, "In the last 12 months, how often have you used cannabis?" = "Weekly" or "Daily or almost daily"                                                                                                                                                          |

**Supplementary Table 2: Matrix of Pearson correlations between exposures in imputed data (N=5212)**

| Variables                                        | (1)   | (2)   | (3)   | (4)   | (5)   | (6)   | (7)   | (8)   | (9)   | (10)  |
|--------------------------------------------------|-------|-------|-------|-------|-------|-------|-------|-------|-------|-------|
| (1) Physical abuse                               | 1.000 |       |       |       |       |       |       |       |       |       |
| (2) Sexual abuse                                 | 0.065 | 1.000 |       |       |       |       |       |       |       |       |
| (3) Emotional abuse                              | 0.269 | 0.074 | 1.000 |       |       |       |       |       |       |       |
| (4) Emotional neglect                            | 0.028 | 0.042 | 0.014 | 1.000 |       |       |       |       |       |       |
| (5) Bullying                                     | 0.050 | 0.026 | 0.039 | 0.073 | 1.000 |       |       |       |       |       |
| (6) Violence between parents                     | 0.140 | 0.038 | 0.187 | 0.053 | 0.044 | 1.000 |       |       |       |       |
| (7) Household substance abuse                    | 0.059 | 0.022 | 0.098 | 0.027 | 0.036 | 0.102 | 1.000 |       |       |       |
| (8) Parent being convicted of a criminal offence | 0.088 | 0.019 | 0.081 | 0.019 | 0.050 | 0.079 | 0.071 | 1.000 |       |       |
| (9) Parent separation                            | 0.069 | 0.056 | 0.162 | 0.050 | 0.044 | 0.168 | 0.108 | 0.071 | 1.000 |       |
| (10) Parent mental health problems or suicide    | 0.121 | 0.041 | 0.195 | 0.039 | 0.053 | 0.153 | 0.089 | 0.055 | 0.156 | 1.000 |

Note: Stata code for correlations across imputed datasets obtained from <https://www.stata.com/statalist/archive/2010-07/msg01382.html>, accessed 10<sup>th</sup> Feb 2023. Correlations were the same to the second decimal place in the complete case and imputed datasets

**Supplementary Table 3: Number of adversities experienced by those reporting four or more adversities**

| Number of ACEs | % within the four+ ACEs group |
|----------------|-------------------------------|
| 4              | 59.99                         |
| 5              | 25.53                         |
| 6              | 11.02                         |
| 7              | 2.68                          |
| 8              | 0.76                          |
| 9              | 0.01                          |

**Supplementary Table 4: Distribution of individual ACEs by ACE count category (%)**

|                                                | 1 ACE | 2/3 ACEs | 4+ Aces |
|------------------------------------------------|-------|----------|---------|
| Parent substance abuse<br>N = 469              | 4.87  | 12.95    | 33.33   |
| Parent mental health/suicide attempt<br>N=2168 | 40.01 | 66.23    | 84.17   |
| Parent criminal conviction<br>N=370            | 4.33  | 9.76     | 26.56   |
| Parental separation<br>N=1095                  | 11.66 | 34.90    | 62.31   |
| Parent inter-partner violence<br>N=980         | 9.01  | 29.44    | 65.47   |
| Bullying<br>N=662                              | 10.20 | 19.37    | 33.46   |
| Physical abuse<br>N=714                        | 6.42  | 19.88    | 52.58   |
| Sexual abuse<br>N=162                          | 1.92  | 3.70     | 12.66   |
| Emotional abuse<br>N=1006                      | 7.30  | 30.95    | 70.20   |
| Emotional neglect<br>N=318                     | 4.26  | 9.39     | 17.99   |

**Supplementary Table 5: Sample characteristics in non-imputed data for the excluded and complete-case participants**

|                                       | Participants excluded due to cannabis measures only available at 13-18 or 20-24<br>N = 3236 <sup>1</sup> |          | Participants with complete data on cannabis use<br>N=911 <sup>1</sup> |          | Participants with complete data on cannabis use and on all study variables<br>N=382 <sup>1</sup> |          |
|---------------------------------------|----------------------------------------------------------------------------------------------------------|----------|-----------------------------------------------------------------------|----------|--------------------------------------------------------------------------------------------------|----------|
| <b>Study variable</b>                 | <b>Frequency</b>                                                                                         | <b>%</b> | <b>Frequency</b>                                                      | <b>%</b> | <b>Frequency</b>                                                                                 | <b>%</b> |
| Parent substance abuse*               | 211                                                                                                      | 10.74    | 53                                                                    | 6.26     | 21                                                                                               | 5.50     |
| Parent mental health/suicide attempt* | 901                                                                                                      | 44.76    | 332                                                                   | 38.56    | 137                                                                                              | 35.86    |
| Parent criminal conviction*           | 140                                                                                                      | 6.82     | 46                                                                    | 5.34     | 24                                                                                               | 6.28     |
| Parental separation*                  | 471                                                                                                      | 25.31    | 126                                                                   | 15.05    | 39                                                                                               | 10.21    |
| IPV*                                  | 354                                                                                                      | 21.11    | 123                                                                   | 15.55    | 51                                                                                               | 13.35    |
| Bullying*                             | 297                                                                                                      | 15.06    | 99                                                                    | 11.09    | 54                                                                                               | 14.14    |
| Physical Abuse*                       | 117                                                                                                      | 6.92     | 108                                                                   | 12.30    | 45                                                                                               | 11.78    |
| Sexual Abuse*                         | 26                                                                                                       | 1.07     | 33                                                                    | 3.69     | 14                                                                                               | 3.66     |
| Emotional abuse*                      | 318                                                                                                      | 18.92    | 149                                                                   | 17.35    | 62                                                                                               | 16.23    |
| Emotional neglect*                    | 66                                                                                                       | 3.92     | 43                                                                    | 4.80     | 24                                                                                               | 6.28     |
| Covariates                            |                                                                                                          |          |                                                                       |          |                                                                                                  |          |

|                                                                |      |       |     |       |     |       |
|----------------------------------------------------------------|------|-------|-----|-------|-----|-------|
| Sex - female                                                   | 1347 | 41.63 | 611 | 67.07 | 261 | 68.32 |
| Lower SES age 0-12                                             | 163  | 10.64 | 23  | 5.03  | 14  | 3.66  |
| Mother's drug use during pregnancy                             | 25   | 0.77  | 2   | 0.22  | 1   | 0.26  |
| Mother's partner drug use during pregnancy                     | 139  | 4.30  | 29  | 3.18  | 8   | 2.09  |
| Mother's mental health problems prior/during pregnancy         | 416  | 12.86 | 77  | 8.45  | 31  | 8.12  |
| Mother's partner mental health problems prior/during pregnancy | 201  | 6.21  | 60  | 6.59  | 27  | 7.07  |
| Financial difficulties during pregnancy                        | 1871 | 57.82 | 440 | 48.30 | 199 | 52.09 |
| <b>Additional data</b>                                         |      |       |     |       |     |       |
| Ethnicity – non-white                                          | 141  | 4.85  | 29  | 3.24  | 12  | 3.14  |

\*Complete if at least 50% of time points were not missing data

<sup>1</sup>Sample size for each reported frequency and proportion will vary due to missing data within the study variables

**Supplementary Table 6: Patterns of missing data and distributions in complete case and imputed data**

| <b>Role in analysis</b> | <b>Variable</b>                              | <b>Proportion missing data</b> | <b>Prevalence/mean in complete case data</b> | <b>Prevalence/mean in imputed dataset</b> |
|-------------------------|----------------------------------------------|--------------------------------|----------------------------------------------|-------------------------------------------|
| Exposure                | Physical abuse                               | 42.09%                         | 13.45%                                       | 13.69%                                    |
|                         | Sexual abuse                                 | 25.34%                         | 2.88%                                        | 3.07%                                     |
|                         | Emotional abuse                              | 43.52%                         | 18.96%                                       | 19.36%                                    |
|                         | Emotional neglect                            | 41.79%                         | 5.71%                                        | 6.07%                                     |
|                         | Bullying                                     | 38.95%                         | 12.34%                                       | 12.67%                                    |
|                         | Household substance abuse                    | 39.02%                         | 8.35%                                        | 8.99%                                     |
|                         | Violence between parents                     | 46.89%                         | 17.62%                                       | 18.76%                                    |
|                         | Parent mental health problems or suicide     | 38.52%                         | 40.61%                                       | 41.61%                                    |
|                         | Parent separation                            | 41.92%                         | 19.70%                                       | 20.88%                                    |
|                         | Parent being convicted of a criminal offence | 36.66%                         | 6.76%                                        | 7.08%                                     |
| Covariate               | Maternal drug use during pregnancy           | 0%                             | 0.63%                                        | -                                         |
|                         | Partner drug use during pregnancy            | 0%                             | 4.72%                                        | -                                         |
|                         | Maternal mental health prior to pregnancy    | 0%                             | 10.69%                                       | -                                         |
|                         | Partner mental health prior to pregnancy     | 0%                             | 5.93%                                        | -                                         |
|                         | Financial difficulties during pregnancy      | 0%                             | 53.93%                                       | -                                         |
|                         | Childhood socioeconomic status               | 53.6%                          | 7.48% (low SES)                              | 7.31% (low SES)                           |
|                         | Cannabis initiation PRS                      | 28.49%                         | .0022 (S.D 1.00)                             | .0005 (S.D 1.00)                          |
|                         | Gender                                       | 0%                             | 39.91% (male)                                | -                                         |

**Supplementary Table 7: Prevalence of cannabis use amongst those attending all 9 waves of data collection age 13-24 (N=911)**

| <b>Cannabis use frequency</b> | <b>13 years</b> | <b>14 years</b> | <b>15 years</b> | <b>16 years</b> | <b>17 years</b> | <b>18 years</b> | <b>20 years</b> | <b>22 years</b> | <b>24 years</b> |
|-------------------------------|-----------------|-----------------|-----------------|-----------------|-----------------|-----------------|-----------------|-----------------|-----------------|
|                               | N (%)           | N (%)           | N (%)           | N (%)           | N (%)           | N (%)           | N (%)           | N (%)           | N (%)           |
| Do not use                    | 894 (98.13)     | 901 (98.90)     | 870 (95.50)     | 844 (92.65)     | 793 (87.05)     | 785 (86.17)     | 675 (74.09)     | 703 (77.17)     | 709 (77.83)     |
| Occasional                    | 16 (1.76)       | 7 (0.77)        | 32 (3.51)       | 53 (5.82)       | 104 (11.42)     | 103 (11.31)     | 204 (22.39)     | 181 (19.87)     | 173 (18.99)     |
| Regular                       | 1 (0.11)        | 3 (0.33)        | 9 (0.99)        | 14 (1.54)       | 14 (1.54)       | 23 (2.52)       | 32 (3.51)       | 27 (2.96)       | 29 (3.18)       |

**Supplementary table 8: Comparing the model fit of classes derived with different levels of available waves of data**

| Measures of model fit                                                         |  |           |           |           |           |           |
|-------------------------------------------------------------------------------|--|-----------|-----------|-----------|-----------|-----------|
| 1+ waves of cannabis use frequency data available at 13-18 and 20-24 (N=5249) |  | 3 classes | 4 classes | 5 classes | 6 classes | 7 classes |
| BIC                                                                           |  | 25328.89  | 25128.20  | 25025.92  | 25014.83  | 25055.15  |
| Replicated loglikelihood                                                      |  | -         |           |           |           |           |
| Entropy                                                                       |  | 12450.30  | -12277.15 | -12153.20 | -12074.84 | -12022.19 |
| LMR p-value                                                                   |  | 0.77      | 0.78      | 0.79      | 0.76      | 0.77      |
| BLRT p-value                                                                  |  | 0.0001    | 0.0000    | 0.0004    | 0.0063    | 0.0048    |
| Smallest class size                                                           |  | 0.0000    | 0.0000    | 0.0000    | 0.0000    | 0.0000    |
|                                                                               |  | 308       | 241       | 135       | 139       | 55        |
| 2+ waves of cannabis use frequency data available at 13-18 and 20-24 (N=3642) |  | 3 classes | 4 classes | 5 classes | 6 classes | 7 classes |
| BIC                                                                           |  | 18808.05  | 18666.99  | 18593.15  | 18589.70  | 18652.84  |
| Replicated loglikelihood                                                      |  | -9200.28  | -9060.48  | -8954.29  | -8883.29  | -8845.59  |
| Entropy                                                                       |  | 0.82      | 0.83      | 0.84      | 0.82      | 0.82      |
| LMR p-value                                                                   |  | 0.0013    | 0.0054    | 0.0000    | 0.0038    | 0.2231    |
| BLRT p-value                                                                  |  | 0.0000    | 0.0000    | 0.0000    | 0.0000    | 0.0000    |
| Smallest class size                                                           |  | 217       | 171       | 70        | 77        | 30        |
| 3+ waves of cannabis use frequency data available at 13-18 and 20-24 (N=1814) |  | 3 classes | 4 classes | 5 classes | 6 classes |           |
| BIC                                                                           |  | 10534.98  | 10504.74  | 10493.238 | 10496.56  |           |
| Replicated loglikelihood                                                      |  | -5079.91  | -5001.01  | -4931.481 | -4869.36  |           |
| Entropy                                                                       |  | 0.88      | 0.82      | 0.82      | 0.84      |           |
| LMR p-value                                                                   |  | 0.4229    | 0.0358    | 0.7118    | 0.9126    |           |
| BLRT p-value                                                                  |  | 0.0000    | 0.0000    | 0.0000    | 0.0000    |           |
| Smallest class size                                                           |  | 63        | 45        | 46        | 42        |           |



### Appendix 3: Regression models with separate covariate adjustment

These tables are intended to supplement the fully adjusted models in the manuscript by presenting the analyses with adjustment for individual covariates. This allows the reader to observe the attenuating effects of the individual covariates.

Exposures and outcomes are as stated in the methods section of the main manuscript. Please note that composite dummy variables were derived of experiencing 0, 1, 2-3 or 4+ ACEs to explore dose-response effects of ACEs on cannabis use. These variables compare the stated number of ACEs reported against all other levels of ACE exposure, including reporting no ACEs.

The conceptualisation of the covariates is outlined in the methods section of the main manuscript.

Appendix table 1: Multinomial regression associations (RRR and 95% CI) between exposure to ACEs age 0-12 and cannabis use frequency latent class membership age 13-24, adjusted for mother/partner drug use during pregnancy

| <b>Exposures age 0-12</b>                           | <b>Early persisting<br/>regular use N =<br/>135</b> | <b>Later onset<br/>regular use N =<br/>236</b> | <b>Early persisting<br/>occasional use<br/>N = 394</b> | <b>Later onset<br/>occasional<br/>use N=868</b> |
|-----------------------------------------------------|-----------------------------------------------------|------------------------------------------------|--------------------------------------------------------|-------------------------------------------------|
|                                                     | Adjusted RRR*<br>(95% CI)                           | Adjusted RRR*<br>(95% CI)                      | Adjusted RRR*<br>(95% CI)                              | Adjusted RRR*<br>(95% CI)                       |
| All other levels of ACE exposure, including no ACEs | 1.0                                                 | 1.0                                            | 1.0                                                    | 1.0                                             |
| One ACE <sup>1</sup><br>N=1508                      | 0.62<br>(0.36 - 1.07)                               | 0.64<br>(0.40 - 1.04)                          | 0.76<br>(0.54 - 1.06)                                  | 0.95<br>(0.72 - 1.24)                           |
| Two-Three ACEs <sup>1</sup><br>N=1657               | 1.52<br>(0.96 - 2.41)                               | 1.65<br>(1.12 - 2.44)                          | 1.54<br>(1.15 – 2.08)                                  | 1.10<br>(0.84 - 1.45)                           |
| Four+ ACEs <sup>1</sup><br>N=542                    | 3.64<br>(2.19 - 6.07)                               | 2.11<br>(1.27 - 3.50)                          | 2.49<br>(1.72 - 3.61)                                  | 1.15<br>(0.74 - 1.80)                           |
| Parent substance abuse<br>N = 469                   | 4.38<br>(2.48 - 7.75)                               | 1.78<br>(0.94 - 3.37)                          | 2.31<br>(1.48-3.60)                                    | 1.76<br>(1.16 - 2.69)                           |
| Parent mental health/suicide attempt<br>N=2168      | 2.26<br>(1.45 - 3.52)                               | 1.28<br>(0.89 - 1.83)                          | 1.50<br>(1.13 - 1.98)                                  | 1.15<br>(0.90 - 1.47)                           |

| <b>Exposures age 0-12</b>           | <b>Early persisting<br/>regular use N =<br/>135</b> | <b>Later onset<br/>regular use N =<br/>236</b> | <b>Early persisting<br/>occasional use<br/>N = 394</b> | <b>Later onset<br/>occasional<br/>use N=868</b> |
|-------------------------------------|-----------------------------------------------------|------------------------------------------------|--------------------------------------------------------|-------------------------------------------------|
|                                     | Adjusted RRR*<br>(95% CI)                           | Adjusted RRR*<br>(95% CI)                      | Adjusted RRR*<br>(95% CI)                              | Adjusted RRR*<br>(95% CI)                       |
| Parent criminal conviction<br>N=370 | 1.28<br>(0.55 - 2.96)                               | 1.24<br>(0.56 - 2.73)                          | 1.90<br>(1.20 - 3.03)                                  | 1.26<br>(0.77 - 2.06)                           |
| Parental separation N=1095          | 1.94<br>(1.17 - 3.21)                               | 1.94<br>(1.30 - 2.89)                          | 1.75<br>(1.26 - 2.42)                                  | 1.04<br>(0.75 - 1.44)                           |
| Parent inter-partner violence N=980 | 1.78<br>(1.02 - 3.08)                               | 1.58<br>(1.00 - 2.50)                          | 1.98<br>(1.41 - 2.77)                                  | 1.03<br>(0.71 - 1.50)                           |
| Bullying<br>N=662                   | 1.93<br>(1.11 - 3.37)                               | 1.56<br>(0.96 - 2.52)                          | 1.13<br>(0.75 - 1.69)                                  | 0.75<br>(0.49- 1.14)                            |
| Physical abuse<br>N=714             | 2.54<br>(1.52 - 4.24)                               | 1.76<br>(1.10 - 2.82)                          | 1.47<br>(1.00 - 2.17)                                  | 1.24<br>(0.87 - 1.77)                           |
| Sexual abuse<br>N=162               | 0.47<br>(0.04 - 5.92)                               | 1.68<br>(0.72 - 3.92)                          | 2.12<br>(1.16 - 3.86)                                  | 0.98<br>(0.44 - 2.20)                           |
| Emotional abuse<br>N=1006           | 2.63<br>(1.64 - 4.23)                               | 1.48<br>(0.95 - 2.29)                          | 1.85<br>(1.32 - 2.60)                                  | 1.13<br>(0.81 - 1.56)                           |
| Emotional neglect<br>N=318          | 1.23<br>(0.53 - 2.87)                               | 0.94<br>(0.43 - 2.02)                          | 0.86<br>(0.48 - 1.56)                                  | 0.57<br>(0.30 - 1.10)                           |

Appendix table 2: Multinomial regression associations (RRR and 95% CI) between exposure to ACEs age 0-12 and cannabis use frequency latent class membership age 13-24, adjusted for parent mental health

| <b>Exposures age 0-12</b>                           | <b>Early persisting<br/>regular use N =<br/>135</b> | <b>Later onset<br/>regular use N =<br/>236</b> | <b>Early persisting<br/>occasional use<br/>N = 394</b> | <b>Later onset<br/>occasional<br/>use N=868</b> |
|-----------------------------------------------------|-----------------------------------------------------|------------------------------------------------|--------------------------------------------------------|-------------------------------------------------|
|                                                     | Adjusted RRR*<br>(95% CI)                           | Adjusted RRR*<br>(95% CI)                      | Adjusted RRR*<br>(95% CI)                              | Adjusted RRR*<br>(95% CI)                       |
| All other levels of ACE exposure, including no ACEs | 1.0                                                 | 1.0                                            | 1.0                                                    | 1.0                                             |
| One ACE <sup>1</sup><br>N=1508                      | 0.61<br>(0.36 - 1.06)                               | 0.63<br>(0.39 - 1.02)                          | 0.75<br>(0.54 - 1.04)                                  | 0.93<br>(0.71 - 1.22)                           |
| Two-Three ACEs <sup>1</sup><br>N=1657               | 1.58<br>(1.00 - 2.49)                               | 1.67<br>(1.13 - 2.46)                          | 1.59<br>(1.19 - 2.13)                                  | 1.12<br>(0.86 - 1.47)                           |
| Four+ ACEs <sup>1</sup><br>N=542                    | 3.63<br>(2.16 - 6.08)                               | 2.18<br>(1.32 - 3.62)                          | 2.64<br>(1.81 - 3.85)                                  | 1.15<br>(0.73 - 1.81)                           |
| Parent substance abuse<br>N = 469                   | 6.18<br>(3.69 - 10.34)                              | 2.51<br>(1.47 - 4.27)                          | 3.06<br>(2.01 - 4.66)                                  | 2.01<br>(1.32 - 3.04)                           |
| Parent mental health/suicide attempt<br>N=2168      | 2.08<br>(1.32 - 3.27)                               | 1.22<br>(0.84 - 1.77)                          | 1.51<br>(1.13 - 2.01)                                  | 1.13<br>(0.88 - 1.46)                           |
| Parent criminal conviction<br>N=370                 | 1.23<br>(0.52 - 2.91)                               | 1.28<br>(0.60 - 2.74)                          | 1.90<br>(1.21 - 2.99)                                  | 1.24<br>(0.76 - 2.03)                           |
| Parental separation N=1095                          | 2.10<br>(1.32 - 3.36)                               | 1.94<br>(1.32 - 2.85)                          | 1.80<br>(1.30 - 2.50)                                  | 1.06<br>(0.77 - 1.46)                           |
| Parent inter-partner violence N=980                 | 1.82                                                | 1.66                                           | 2.04                                                   | 1.04                                            |

| Exposures age 0-12         | Early persisting<br>regular use N =<br>135 | Later onset<br>regular use N =<br>236 | Early persisting<br>occasional use<br>N = 394 | Later onset<br>occasional<br>use N=868 |
|----------------------------|--------------------------------------------|---------------------------------------|-----------------------------------------------|----------------------------------------|
|                            | Adjusted RRR*<br>(95% CI)                  | Adjusted RRR*<br>(95% CI)             | Adjusted RRR*<br>(95% CI)                     | Adjusted RRR*<br>(95% CI)              |
|                            | (1.06 - 3.14)                              | (1.06 - 2.58)                         | (1.46 - 2.85)                                 | (0.72 - 1.50)                          |
| Bullying<br>N=662          | 1.81<br>(1.04 - 3.14)                      | 1.5<br>(0.95 - 2.50)                  | 1.12<br>(0.75 - 1.66)                         | 0.75<br>(0.49 - 1.15)                  |
| Physical abuse<br>N=714    | 2.17<br>(1.29 - 3.65)                      | 1.68<br>(1.06 - 2.68)                 | 1.44<br>(0.98 - 2.12)                         | 1.23<br>(0.86 - 1.76)                  |
| Sexual abuse<br>N=162      | 0.30<br>(0.02 - 6.09)                      | 1.66<br>(0.73 - 3.79)                 | 2.03<br>(1.10 - 3.73)                         | 0.94<br>(0.41 - 2.13)                  |
| Emotional abuse<br>N=1006  | 2.49<br>(1.55 - 4.02)                      | 1.45<br>(0.93 - 2.26)                 | 1.88<br>(1.34 - 2.65)                         | 1.12<br>(0.80 - 1.56)                  |
| Emotional neglect<br>N=318 | 1.21<br>(0.50 - 2.92)                      | 0.97<br>(0.44 - 2.12)                 | 0.87<br>(0.48 - 1.58)                         | 0.57<br>(0.30 - 1.09)                  |

Appendix table 3: Multinomial regression associations (RRR and 95% CI) between exposure to ACEs age 0-12 and cannabis use frequency latent class membership age 13-24, adjusted for cannabis PRS

| <b>Exposures age 0-12</b>                           | <b>Early persisting regular use N = 135</b> | <b>Later onset regular use N = 236</b> | <b>Early persisting occasional use N = 394</b> | <b>Later onset occasional use N=868</b> |
|-----------------------------------------------------|---------------------------------------------|----------------------------------------|------------------------------------------------|-----------------------------------------|
|                                                     | Adjusted RRR*<br>(95% CI)                   | Adjusted RRR*<br>(95% CI)              | Adjusted RRR*<br>(95% CI)                      | Adjusted RRR*<br>(95% CI)               |
| All other levels of ACE exposure, including no ACEs | 1.0                                         | 1.0                                    | 1.0                                            | 1.0                                     |
| One ACE <sup>1</sup><br>N=1508                      | 0.59<br>(0.35 - 1.02)                       | 0.63<br>(0.39 - 1.01)                  | 0.75<br>(0.53 - 1.04)                          | 0.94<br>(0.72 - 1.24)                   |
| Two-Three ACEs <sup>1</sup><br>N=1657               | 1.68<br>(1.07 - 2.63)                       | 1.70<br>(1.15 - 2.51)                  | 1.58<br>(1.18 - 2.12)                          | 1.13<br>(0.86 - 1.48)                   |
| Four+ ACEs <sup>1</sup><br>N=542                    | 4.25<br>(2.60 - 6.94)                       | 2.31<br>(1.42 - 3.74)                  | 2.61<br>(1.81 - 3.78)                          | 1.16<br>(0.74 - 1.81)                   |
| Parent substance abuse<br>N = 469                   | 7.19<br>(4.40 - 11.76)                      | 2.58<br>(1.50 - 4.45)                  | 3.07<br>(2.03 - 4.65)                          | 2.02<br>(1.34 - 3.04)                   |
| Parent mental health/suicide attempt<br>N=2168      | 2.37<br>(1.52 - 3.68)                       | 1.29<br>(0.90 - 1.84)                  | 1.51<br>(1.14 - 2.00)                          | 1.15<br>(0.90 - 1.47)                   |
| Parent criminal conviction<br>N=370                 | 1.30<br>(0.56 - 3.00)                       | 1.32<br>(0.63 - 2.76)                  | 1.88<br>(1.20 - 2.95)                          | 1.22<br>(0.75 - 2.00)                   |
| Parental separation N=1095                          | 2.26<br>(1.41 - 3.61)                       | 1.99<br>(1.36 - 2.90)                  | 1.81<br>(1.30 - 2.51)                          | 1.06<br>(0.77 - 1.46)                   |

| <b>Exposures age 0-12</b>           | <b>Early persisting regular use N = 135</b> | <b>Later onset regular use N = 236</b> | <b>Early persisting occasional use N = 394</b> | <b>Later onset occasional use N=868</b> |
|-------------------------------------|---------------------------------------------|----------------------------------------|------------------------------------------------|-----------------------------------------|
|                                     | Adjusted RRR*<br>(95% CI)                   | Adjusted RRR*<br>(95% CI)              | Adjusted RRR*<br>(95% CI)                      | Adjusted RRR*<br>(95% CI)               |
| Parent inter-partner violence N=980 | 1.91<br>(1.11 - 3.29)                       | 1.69<br>(1.09 - 2.62)                  | 2.01<br>(1.44 - 2.82)                          | 1.04<br>(0.72 - 1.50)                   |
| Bullying<br>N=662                   | 1.95<br>(1.12 - 3.37)                       | 1.57<br>(0.97 - 2.55)                  | 1.14<br>(0.77 - 1.71)                          | 0.76<br>(0.49 - 1.15)                   |
| Physical abuse<br>N=714             | 2.48<br>(1.51 - 4.08)                       | 1.76<br>(1.11 - 2.79)                  | 1.48<br>(1.00 - 2.17)                          | 1.24<br>(0.87 - 1.77)                   |
| Sexual abuse<br>N=162               | 0.43<br>(0.04 - 4.40)                       | 1.68<br>(0.72 - 3.91)                  | 1.95<br>(1.07 - 3.54)                          | 0.91<br>(0.40 - 2.07)                   |
| Emotional abuse<br>N=1006           | 2.80<br>(1.76 - 4.47)                       | 1.53<br>(0.99 - 2.36)                  | 1.89<br>(1.35 - 2.65)                          | 1.12<br>(0.81 - 1.56)                   |
| Emotional neglect<br>N=318          | 1.20<br>(0.51 - 2.85)                       | 0.97<br>(0.45 - 2.12)                  | 0.88<br>(0.49 - 1.58)                          | 0.57<br>(0.29 - 1.10)                   |

Appendix table 4: Multinomial regression associations (RRR and 95% CI) between exposure to ACEs age 0-12 and cannabis use frequency latent class membership age 13-24, adjusted for SEP

| <b>Exposures age 0-12</b>                           | <b>Early persisting<br/>regular use N =<br/>135</b> | <b>Later onset<br/>regular use N =<br/>236</b> | <b>Early persisting<br/>occasional use<br/>N = 394</b> | <b>Later onset<br/>occasional<br/>use N=868</b> |
|-----------------------------------------------------|-----------------------------------------------------|------------------------------------------------|--------------------------------------------------------|-------------------------------------------------|
|                                                     | Adjusted RRR*<br>(95% CI)                           | Adjusted RRR*<br>(95% CI)                      | Adjusted RRR*<br>(95% CI)                              | Adjusted RRR*<br>(95% CI)                       |
| All other levels of ACE exposure, including no ACEs | 1.0                                                 | 1.0                                            | 1.0                                                    | 1.0                                             |
| One ACE <sup>1</sup><br>N=1508                      | 0.59<br>(0.34 - 1.03)                               | 0.63<br>(0.39 - 1.02)                          | 0.74<br>(0.53 - 1.03)                                  | 0.92<br>(0.70 - 1.21)                           |
| Two-Three ACEs <sup>1</sup><br>N=1657               | 1.63<br>(1.04 - 2.55)                               | 1.66<br>(1.12 - 2.44)                          | 1.59<br>(1.18 - 2.14)                                  | 1.14<br>(0.87 - 1.50)                           |
| Four+ ACEs <sup>1</sup><br>N=542                    | 4.06<br>(2.46 - 6.72)                               | 2.18<br>(1.33 - 3.56)                          | 2.65<br>(1.83 - 3.85)                                  | 1.23<br>(0.79 - 1.92)                           |
| Parent substance abuse<br>N = 469                   | 6.77<br>(4.11 - 11.17)                              | 2.51<br>(1.48 - 4.28)                          | 3.08<br>(2.03 - 4.67)                                  | 2.12<br>(1.40 - 3.21)                           |
| Parent mental health/suicide attempt<br>N=2168      | 2.29<br>(1.47 - 3.57)                               | 1.24<br>(0.87 - 1.78)                          | 1.51<br>(1.13 - 2.01)                                  | 1.18<br>(0.92 - 1.51)                           |
| Parent criminal conviction<br>N=370                 | 1.29<br>(0.56 - 2.98)                               | 1.28<br>(0.61 - 2.71)                          | 1.91<br>(1.21 - 3.01)                                  | 1.26<br>(0.77 - 2.06)                           |
| Parental separation N=1095                          | 2.13<br>(1.30 - 3.48)                               | 1.90<br>(1.30 - 2.79)                          | 1.83<br>(1.32 - 2.53)                                  | 1.08<br>(0.78 - 1.50)                           |

| <b>Exposures age 0-12</b>           | <b>Early persisting<br/>regular use N =<br/>135</b> | <b>Later onset<br/>regular use N =<br/>236</b> | <b>Early persisting<br/>occasional use<br/>N = 394</b> | <b>Later onset<br/>occasional<br/>use N=868</b> |
|-------------------------------------|-----------------------------------------------------|------------------------------------------------|--------------------------------------------------------|-------------------------------------------------|
|                                     | Adjusted RRR*<br>(95% CI)                           | Adjusted RRR*<br>(95% CI)                      | Adjusted RRR*<br>(95% CI)                              | Adjusted RRR*<br>(95% CI)                       |
| Parent Inter-Partner violence N=980 | 1.86<br>(1.08 - 3.21)                               | 1.63<br>(1.04 - 2.54)                          | 2.04<br>(1.46 - 2.86)                                  | 1.07<br>(0.74 - 1.54)                           |
| Bullying<br>N=662                   | 1.90<br>(1.10 - 3.29)                               | 1.55<br>(0.96 - 2.50)                          | 1.11<br>(0.75 - 1.66)                                  | 0.76<br>(0.50 - 1.16)                           |
| Physical abuse<br>N=714             | 2.40<br>(1.46 - 3.95)                               | 1.72<br>(1.08 - 2.73)                          | 1.47<br>(0.99 - 2.16)                                  | 1.24<br>(0.87 - 1.77)                           |
| Sexual abuse<br>N=162               | 0.43<br>(0.05 - 3.87)                               | 1.63<br>(0.72 - 3.72)                          | 2.02<br>(1.10 - 3.69)                                  | 1.03<br>(0.47 - 2.28)                           |
| Emotional abuse<br>N=1006           | 2.74<br>(1.72 - 4.38)                               | 1.47<br>(0.94 - 2.29)                          | 1.89<br>(1.35 - 2.66)                                  | 1.15<br>(0.83 - 1.60)                           |
| Emotional neglect<br>N=318          | 1.12<br>(0.47 - 2.65)                               | 0.95<br>(0.44 - 2.06)                          | 0.88<br>(0.49 - 1.59)                                  | 0.57<br>(0.29 - 1.11)                           |
